# Supplementary material for: A descriptive analysis of fatal outcomes in immune thrombotic thrombocytopenic purpura in the USTMA TTP Registry
Source: PubMed Central journal article supplement — Blood Adv. 2023 Dec 17;8(3):620–3. doi: 10.1182/bloodadvances.2023010807 (PMC10838690; doi:10.1182/bloodadvances.2023010807), 2023-12-17
Supplement: BLOODA_ADV-2023-010807-mmc1.pdf [file BLOODA_ADV-2023-010807-mmc1.pdf]

## Supplementary Materials

### Table of Contents

|                                                                                                                                   |   |
|-----------------------------------------------------------------------------------------------------------------------------------|---|
| Supplementary Table 1. Baseline demographics and laboratory variables stratified by availability of ADAMTS13 confirmation status. | 2 |
| Supplementary Table 2. Fatal outcomes at initial presentation in patients with and without ADAMTS13 confirmation                  | 3 |

**Supplementary Table 1.** Baseline demographics and laboratory variables stratified by availability of ADAMTS13 confirmation status.

| Variable                                    | ADAMT13 confirmed (N=362) | ADAMTS13 not tested (N=57)* | P-value            |
|---------------------------------------------|---------------------------|-----------------------------|--------------------|
| <b>Age (years)</b>                          |                           |                             |                    |
| Mean (SD)                                   | 44.6 (15.5)               | 38.2 (14.3)                 | 0.003 <sup>t</sup> |
| Median (IQR)                                | 43.0 (33.0, 55.2)         | 37.8 (27.2, 46.9)           | -                  |
| <b>Sex</b>                                  |                           |                             |                    |
| Female                                      | 256 (70.7%)               | 40 (70.2%)                  | 0.93 <sup>c</sup>  |
| <b>Hemoglobin (g/dL)</b>                    |                           |                             |                    |
| Hemoglobin - Mean (SD)                      | 8.5 (2.0)                 | 7.6 (1.7)                   | -                  |
| Median (IQR)                                | 8.2 (7.2, 9.6)            | 7.2 (6.4, 8.9)              | 0.010 <sup>e</sup> |
| <b>Platelet count (x 10<sup>3</sup>/μL)</b> |                           |                             |                    |
| Mean (SD)                                   | 20.8 (23.6)               | 26.2 (24.4)                 | -                  |
| Median (IQR)                                | 14.0 (9.0, 24.0)          | 16.5 (11.0, 31.8)           | 0.06 <sup>e</sup>  |
| <b>Serum Creatinine (mg/dL)</b>             |                           |                             |                    |
| Mean (SD)                                   | 1.5 (1.2)                 | 1.4 (0.9)                   | -                  |
| Median (IQR)                                | 1.2 (0.9, 1.8)            | 1.0 (0.8, 1.7)              | 0.23 <sup>e</sup>  |
| <b>Lactate dehydrogenase (U/L)</b>          |                           |                             |                    |
| Mean (SD)                                   | 1664.3 (1420.1)           | 1611.0 (1169.4)             | -                  |
| Median (IQR)                                | 1256.0 (795.5, 1904.5)    | 1239.0 (788.5, 2340.5)      | 0.97 <sup>e</sup>  |

Missing values: Age=28/1, Hemoglobin=1/22, Platelets=0/9, Creatinine=4/24, LDH=7/22.

<sup>t</sup> T-test, <sup>c</sup> Chi-squared test, <sup>e</sup> Exact wilcoxon rank sum test.

**Supplementary Table 2.** Fatal outcomes at initial presentation in patients with and without ADAMTS13 confirmation

|                      | <b>ADAMTS13 confirmed (n=362)</b> | <b>ADAMTS13 not confirmed (n=58)</b> |
|----------------------|-----------------------------------|--------------------------------------|
| <b>Fatal outcome</b> | 17 (4.7%)                         | 7 (12.1%)                            |
